# Supplementary material for: Remote sensing-aided rainfall–runoff modeling in the tropics of Costa Rica
Source: Copernicus journal article supplement (doi:10.5194/hess-26-975-2022), 2022-02-21
Supplement: Supplementary file 1 [file hess-26-975-2022-supplement.pdf]

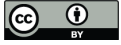

*Supplement of*

## **Remote sensing-aided rainfall–runoff modeling in the tropics of Costa Rica**

**Saúl Arciniega-Esparza et al.**

*Correspondence to:* Saúl Arciniega-Esparza ([sarciniegae@comunidad.unam.mx](mailto:sarciniegae@comunidad.unam.mx))

The copyright of individual parts of the supplement might differ from the article licence.

5

## 10 Supplement

15

### Contents of this file

**Figure S1.** Annual correlations of a) precipitation from CHIRPS and streamflow, b) precipitation from bias-corrected CHIRPS and streamflow, c) precipitation from CHIRPS and streamflow plus actual evapotranspiration, and d) precipitation from bias-corrected CHIRPS and streamflow plus actual evapotranspiration. Data corresponds to a single time series merged using the 13 observed streamflow time series.

**Figure S2.** Statistics of CHIRPS and corrected CHIRPS (CHIRPSc) performance with respect to ground precipitation. a) computed normalized MAE at daily scale, b) computed normalized MAE at monthly scale, c) computed normalized MAE at annual scale and d) confusion matrix of days with rain and days without rain, e) False alarm ratio between ground precipitation and CHIRPS, f) Probability of detection, g) Threat Score. MAE was normalized by the mean of precipitation.

**Figure S3.** Long-term water balance using the Budyko curve, where the left panel corresponds to the aridity index and evaporative index computed from the bias-corrected precipitation and AET from MODIS. The right panel shows the computed indices using the HYPE simulations with the configuration M4.

**Figure S4.** Metrics from the stepwise parameter estimation for each model configuration of the calibration period (streamflow 1991-1999, PET-ET 2001-2010) and validation period (streamflow 2000-2003, PET-ET 2011-2014). The values shown correspond to the mean $\pm$ std computed using all catchments.

**Table S1.** Computed flow metrics for monitored catchments on the Caribbean slope. Streamflow period from 1991-2003. PET-ET period from 2001 to 2014. Qtd is daily streamflow. Slope.Qtd corresponds to the flow duration curve slope (Qt33-

$Qt_{66}/(0.66-0.33)$ . RC is the streamflow coefficient (mean annual  $Qt/Prec$ ). AI is the aridity index (mean annual  $PET/Prec$ ).

35 EI is the evaporative index (mean annual  $ET/Prec$ ).

**Table S2.** Computed flow metrics for monitored catchments on the Pacific slope. Streamflow period from 1991-2003. PET-ET period from 2001 to 2014.  $Q_{td}$  is daily streamflow. Slope. $Q_{td}$  corresponds to the flow duration curve slope ( $Qt_{33}-Qt_{66})/(0.66-0.33)$ . RC is the streamflow coefficient (mean annual  $Qt/Prec$ ). AI is the aridity index (mean annual  $PET/Prec$ ). EI is the evaporative index (mean annual  $ET/Prec$ ).

#### 40 **Introduction**

This supplementary material contains additional results for the precipitation bias correction. Figures S1 and S2 show the errors obtained by the bias correction technique at different time scales and the comparison of annual streamflow and precipitation.

Tables show detailed model performance results and simulated hydrological signatures for the monitored catchments.

45

50

55

60

65

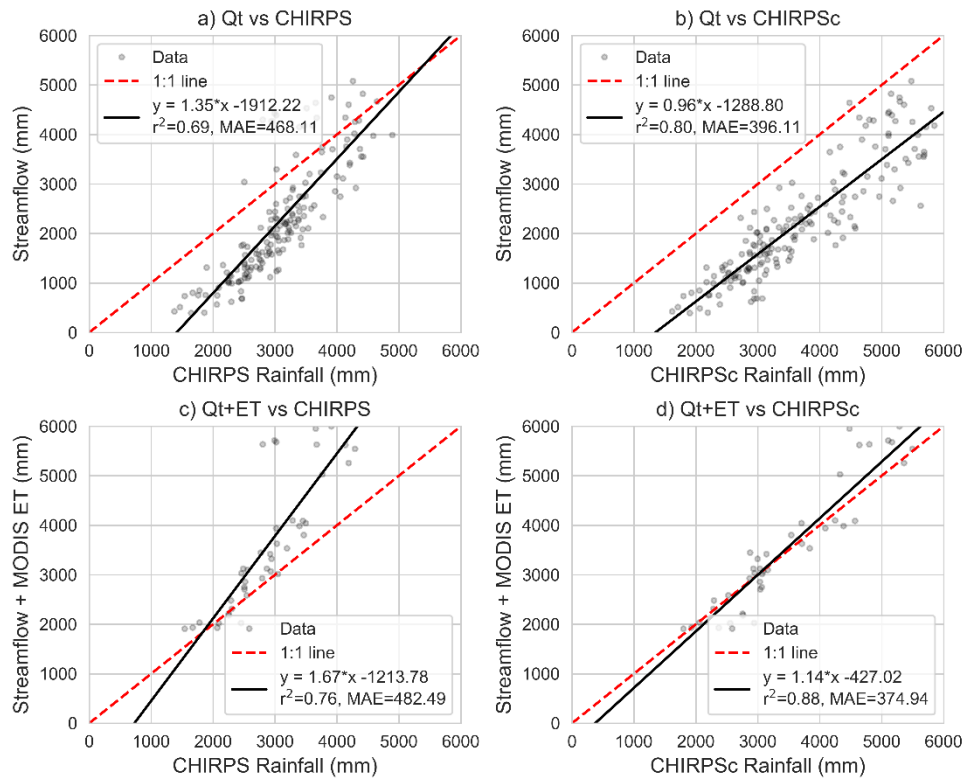

**Figure S1.** Annual correlations of a) precipitation from CHIRPS and streamflow, b) precipitation from bias-corrected CHIRPS and streamflow, c) precipitation from CHIRPS and streamflow plus actual evapotranspiration, and d) precipitation from bias-corrected CHIRPS and streamflow plus actual evapotranspiration. Data corresponds to a single time series merged using the 13 observed streamflow time series.

75

80

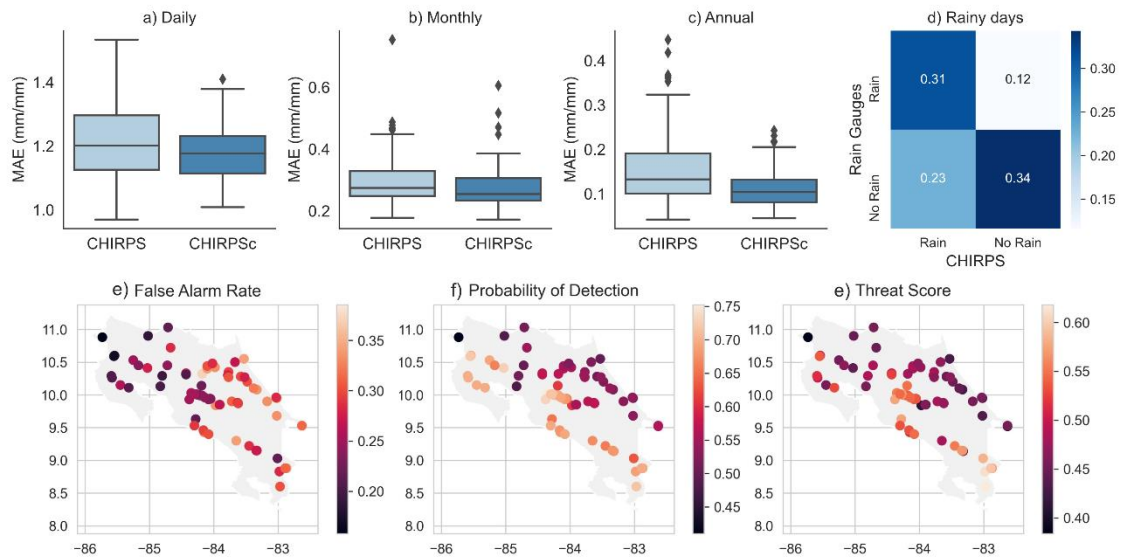

**Figure S2.** Statistics of CHIRPS and corrected CHIRPS (CHIRPSc) performance with respect to ground precipitation. a) 85 computed normalized MAE at daily scale, b) computed normalized MAE at monthly scale, c) computed normalized MAE at annual scale and d) confusion matrix of days with rain and days without rain, e) False alarm ratio between ground precipitation and CHIRPS, f) Probability of detection, g) Threat Score. MAE was normalized by the mean of precipitation.

90

95

100

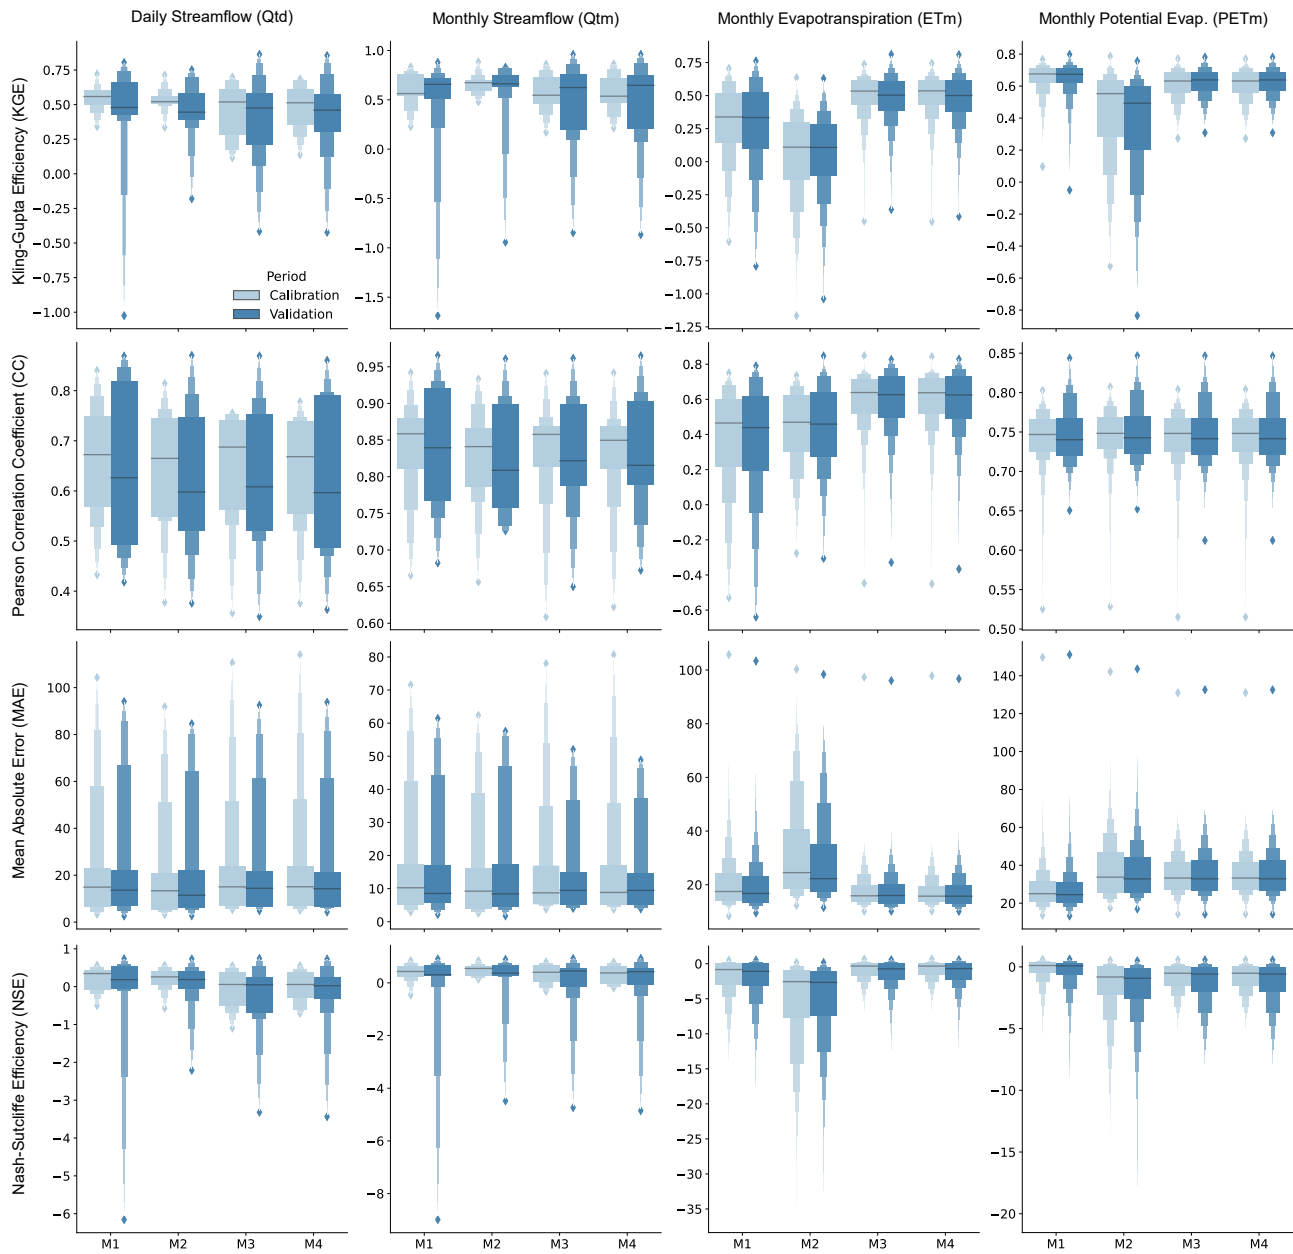

105

**Figure S3.** Metrics from the stepwise parameter estimation for each model configuration of the calibration period (streamflow 1991-1999, PET-ET 2001-2010) and validation period (streamflow 2000-2003, PET-ET 2011-2014). The values shown correspond to the mean $\pm$ std computed using all catchments.

110

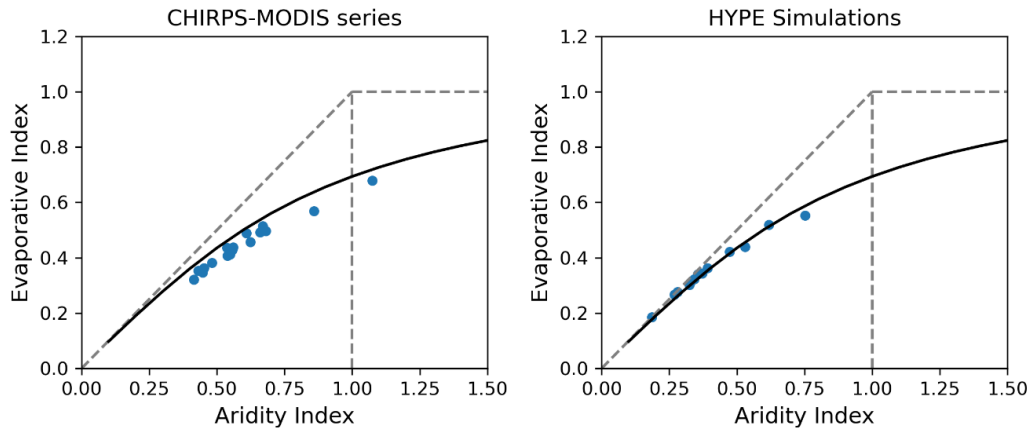

**Figure S4.** Long-term water balance using the Budyko curve, where the left panel corresponds to the aridity index and evaporative index computed from the bias-corrected precipitation and AET from MODIS. The right panel shows the  
 115 computed indices using the HYPE simulations with the configuration M4.

120

125

130

135

**Table S1.** Computed flow metrics for monitored catchments on the Caribbean slope. Streamflow period from 1991-2003. PET-ET period from 2001 to 2014. Qtd is daily streamflow. Slope.Qtd corresponds to the flow duration curve slope  $(Qt33-Qt66)/(0.66-0.33)$ . RC is the streamflow coefficient (mean annual  $Qt/Prec$ ). AI is the aridity index (mean annual  $PET/Prec$ ). EI is the evaporative index (mean annual  $ET/Prec$ ).

| Statistic                      | Model | Cariblanco | Oriente | Dos Montanas | Terron Colorado | Guatuso |
|--------------------------------|-------|------------|---------|--------------|-----------------|---------|
| Mean.Qtd<br>( $m^3 s^{-1}$ )   | Obs   | 8.51       | 28.75   | 53.65        | 137.58          | 26.7    |
|                                | M1    | 8.09       | 29.3    | 53.69        | 135.87          | 28.1    |
|                                | M2    | 7.73       | 28.65   | 48.98        | 125.69          | 25.37   |
|                                | M3    | 9.32       | 33.65   | 63.29        | 139.28          | 29.09   |
|                                | M4    | 9.32       | 33.64   | 63.25        | 139.07          | 29.11   |
| Median.Qtd<br>( $m^3 s^{-1}$ ) | Obs   | 7.44       | 26.1    | 47.2         | 127             | 21      |
|                                | M1    | 7.74       | 29.01   | 51.86        | 120.42          | 19.06   |
|                                | M2    | 6.16       | 27.73   | 43.23        | 95.95           | 15.68   |
|                                | M3    | 8.4        | 31.53   | 56.67        | 116.81          | 20.08   |
|                                | M4    | 8.79       | 32.34   | 59.75        | 121.63          | 21.16   |
| Slope.Qtd<br>( $m^3 s^{-1}$ )  | Obs   | 10.05      | 44.43   | 78.18        | 213.41          | 43.33   |
|                                | M1    | 18.99      | 73      | 128.03       | 500.44          | 97.06   |
|                                | M2    | 15.24      | 69.23   | 93.46        | 363.09          | 68.96   |
|                                | M3    | 24.62      | 76.73   | 131.15       | 417.68          | 75.91   |
|                                | M4    | 23.2       | 76.04   | 126.09       | 443.05          | 80.24   |
| CV.Qtd<br>(-)                  | Obs   | 0.74       | 0.62    | 0.71         | 0.64            | 0.99    |
|                                | M1    | 0.83       | 0.74    | 0.73         | 0.9             | 1.04    |
|                                | M2    | 0.99       | 0.73    | 0.69         | 0.88            | 1.11    |
|                                | M3    | 0.99       | 0.74    | 0.74         | 0.83            | 0.99    |
|                                | M4    | 0.87       | 0.71    | 0.7          | 0.82            | 0.95    |
| SC<br>(-)                      | Obs   | 0.66       | 0.71    | 0.61         | 0.54            | 0.67    |
|                                | M1    | 0.62       | 0.72    | 0.61         | 0.53            | 0.70    |
|                                | M2    | 0.59       | 0.70    | 0.55         | 0.49            | 0.63    |
|                                | M3    | 0.72       | 0.82    | 0.72         | 0.54            | 0.72    |
|                                | M4    | 0.72       | 0.82    | 0.72         | 0.54            | 0.72    |
| AI<br>(-)                      | Obs   | 0.3        | 0.31    | 0.38         | 0.44            | 0.34    |
|                                | M1    | 0.4        | 0.31    | 0.4          | 0.41            | 0.38    |
|                                | M2    | 0.44       | 0.33    | 0.46         | 0.49            | 0.48    |
|                                | M3    | 0.28       | 0.19    | 0.27         | 0.37            | 0.34    |
|                                | M4    | 0.28       | 0.19    | 0.27         | 0.37            | 0.34    |
| EI<br>(-)                      | Obs   | 0.25       | 0.24    | 0.31         | 0.35            | 0.26    |
|                                | M1    | 0.38       | 0.3     | 0.38         | 0.36            | 0.35    |
|                                | M2    | 0.41       | 0.32    | 0.44         | 0.41            | 0.42    |
|                                | M3    | 0.28       | 0.19    | 0.27         | 0.35            | 0.32    |
|                                | M4    | 0.28       | 0.19    | 0.27         | 0.35            | 0.32    |



**Table S2.** Computed flow metrics for monitored catchments on the Pacific slope. Streamflow period from 1991-2003. PET-ET period from 2001 to 2014. Qtd is daily streamflow. Slope.Qtd corresponds to the flow duration curve slope ( $Qt_{33}-Qt_{66}/(0.66-0.33)$ ). RC is the streamflow coefficient (mean annual  $Qt/Prec$ ). AI is the aridity index (mean annual  $PET/Prec$ ). EI is the evaporative index (mean annual  $ET/Prec$ ).

| Statistic                      | Model | Providencia | Tacares | Guapinol | Caracucho | El Rey | Rancho Rey | Guardia | Palmar  |
|--------------------------------|-------|-------------|---------|----------|-----------|--------|------------|---------|---------|
| Mean.Qtd<br>( $m^3 s^{-1}$ )   | Obs   | 6.8         | 11.16   | 10.52    | 72.31     | 34.92  | 9.52       | 24.51   | 301.65  |
|                                | M1    | 8.35        | 10.98   | 9.39     | 60.38     | 29.98  | 12.07      | 25.32   | 312.64  |
|                                | M2    | 8.27        | 10.87   | 9.34     | 57.66     | 29.18  | 11.25      | 23.64   | 306.44  |
|                                | M3    | 10.3        | 13.66   | 10.38    | 75.75     | 36.34  | 12.66      | 30.34   | 353.03  |
|                                | M4    | 10.3        | 13.61   | 10.33    | 75.59     | 36.15  | 12.62      | 30.25   | 352.19  |
| Median.Qtd<br>( $m^3 s^{-1}$ ) | Obs   | 4.44        | 8.35    | 6.35     | 50        | 17.6   | 6.72       | 12.6    | 216     |
|                                | M1    | 6.14        | 6.94    | 3.82     | 43.13     | 16.88  | 5.54       | 9.11    | 264.58  |
|                                | M2    | 5.39        | 6.99    | 5.07     | 38.36     | 18.49  | 7.47       | 13.11   | 236.48  |
|                                | M3    | 7.39        | 9.26    | 6.09     | 58.96     | 20.59  | 8.74       | 12.49   | 299.49  |
|                                | M4    | 8.07        | 9.14    | 4.82     | 60.19     | 19.03  | 7.47       | 10.83   | 301.87  |
| Slope.Qtd<br>( $m^3 s^{-1}$ )  | Obs   | 12.27       | 18.11   | 20.15    | 133.19    | 63.02  | 10.09      | 20.76   | 687.88  |
|                                | M1    | 22.58       | 34.91   | 25.92    | 166.87    | 78.79  | 28.85      | 51.15   | 972.81  |
|                                | M2    | 13.92       | 22.84   | 22.58    | 90.28     | 60.29  | 24.86      | 30.71   | 699.81  |
|                                | M3    | 33.63       | 40.65   | 25.42    | 187.28    | 88.75  | 26.42      | 46.49   | 959.84  |
|                                | M4    | 31.56       | 44.28   | 25.86    | 201.09    | 96.28  | 26.92      | 42.32   | 1018.52 |
| CV.Qtd<br>(-)                  | Obs   | 0.96        | 0.68    | 1.39     | 1.01      | 1.39   | 1.12       | 2.08    | 1.04    |
|                                | M1    | 0.98        | 1       | 1.21     | 0.95      | 1.15   | 1.2        | 1.68    | 0.92    |
|                                | M2    | 0.93        | 1.02    | 1.11     | 0.89      | 1.1    | 0.95       | 1.39    | 0.9     |
|                                | M3    | 1.03        | 1.01    | 1.06     | 0.83      | 1.08   | 0.89       | 1.42    | 0.85    |
|                                | M4    | 0.95        | 1.01    | 1.08     | 0.82      | 1.09   | 0.91       | 1.42    | 0.85    |
| RC<br>(-)                      | Obs   | 0.48        | 0.53    | 0.59     | 0.62      | 0.58   | 0.38       | 0.36    | 0.58    |
|                                | M1    | 0.60        | 0.52    | 0.53     | 0.53      | 0.50   | 0.48       | 0.38    | 0.60    |
|                                | M2    | 0.59        | 0.52    | 0.52     | 0.50      | 0.49   | 0.44       | 0.35    | 0.59    |
|                                | M3    | 0.74        | 0.65    | 0.58     | 0.66      | 0.61   | 0.50       | 0.46    | 0.68    |
|                                | M4    | 0.74        | 0.65    | 0.58     | 0.66      | 0.61   | 0.50       | 0.46    | 0.68    |
| AI<br>(-)                      | Obs   | 0.54        | 0.52    | 0.73     | 0.54      | 0.66   | 0.8        | 0.94    | 0.51    |
|                                | M1    | 0.56        | 0.63    | 0.67     | 0.54      | 0.69   | 0.68       | 0.87    | 0.47    |
|                                | M2    | 0.56        | 0.66    | 0.7      | 0.58      | 0.74   | 0.76       | 0.97    | 0.49    |
|                                | M3    | 0.33        | 0.39    | 0.53     | 0.36      | 0.47   | 0.63       | 0.72    | 0.35    |
|                                | M4    | 0.33        | 0.39    | 0.53     | 0.36      | 0.47   | 0.63       | 0.72    | 0.35    |
| EI<br>(-)                      | Obs   | 0.39        | 0.42    | 0.54     | 0.41      | 0.51   | 0.53       | 0.6     | 0.39    |
|                                | M1    | 0.45        | 0.5     | 0.5      | 0.47      | 0.53   | 0.56       | 0.63    | 0.4     |
|                                | M2    | 0.46        | 0.5     | 0.5      | 0.5       | 0.54   | 0.6        | 0.65    | 0.42    |
|                                | M3    | 0.31        | 0.36    | 0.44     | 0.34      | 0.42   | 0.53       | 0.54    | 0.33    |
|                                | M4    | 0.31        | 0.37    | 0.44     | 0.34      | 0.42   | 0.54       | 0.54    | 0.33    |
